# Supplementary material for: Chemical Composition and Antimicrobial Activity of Essential Oils from the Aerial Parts of Pinus eldarica Grown in Northwestern Iran
Source: PubMed Central journal article supplement (PMC6749391; doi:10.3390/molecules24173203), 2019-09-03
Supplement: molecules-24-03203-s001.pdf [file molecules-24-03203-s001.pdf]

## Supporting Information

# Chemical Composition and Antimicrobial Activity of Essential Oils from the Aerial Parts of *Pinus eldarica* Grown in Northwestern Iran

Taiyeb Ghaffari <sup>1</sup>, Hossein Samadi Kafil <sup>2</sup>, Solmaz Asnaashari <sup>3</sup>, Safar Farajnia <sup>2</sup>, Abbas Delazar <sup>4</sup>, Su Cheol Baek <sup>5</sup>, Hamed Hamishehkar <sup>2,\*</sup> and Ki Hyun Kim <sup>5,\*</sup>

<sup>1</sup> Drug Applied Research Center, Student Research Committee, Tabriz University of Medical Sciences, Tabriz, Iran; ghaffari.t@tbzmed.ac.ir (T.G.)

<sup>2</sup> Drug Applied Research Center, Tabriz University of Medical Sciences, Tabriz, Iran; kafilhs@tbzmed.ac.ir (H.S.K.); farajnia@gmail.com (S.F.)

<sup>3</sup> Biotechnology Research Center, Tabriz University of Medical Sciences, Tabriz, Iran; asnaasharisolmaz@gmail.com (S.A.)

<sup>4</sup> Research Center for Evidence based Medicine, Tabriz University of Medical Sciences, Tabriz, Iran; delazara@tbzmed.ac.ir (A.D.)

<sup>5</sup> School of Pharmacy, Sungkyunkwan University, Suwon 16419, Republic of Korea; schii513@daum.net (S.C.B.)

\*Correspondence: hamishehkarh@tbzmed.ac.ir (H.H.); khkim83@skku.edu (K.H.K.); Tel.: +98-41-3363311 (H.H.); +82-31-290-7700 (K.H.K.)

### 1) Gas chromatogram from the GC/MS analysis of the pollen EOs

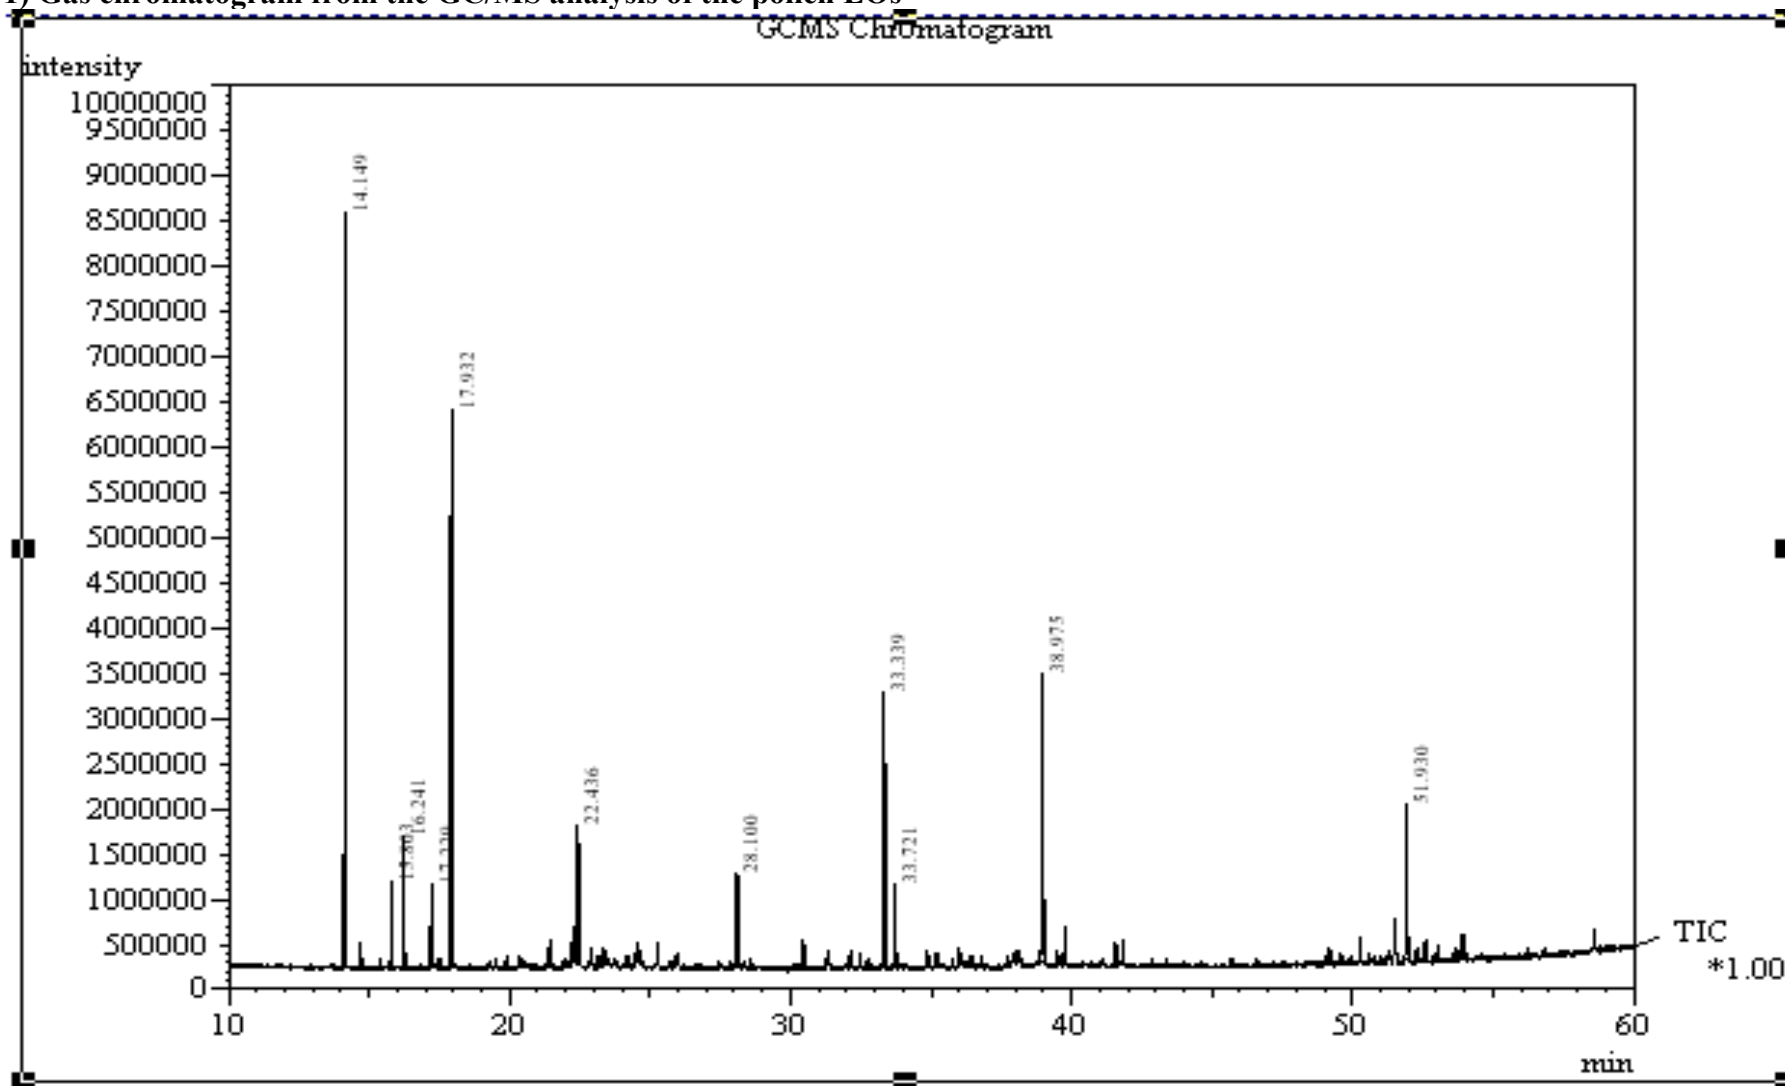

### 1-1) Condition and method

```

[GC-17A Ver.3]
Inj. Initial Temp. :270.00 °C
Interface Temp. :300.00 °C
Control Mode :Split
Column Inlet Pressure :150.0 kPa
Column Flow :1.3 mL/min
Linear Velocity :29.6 cm/sec
Split Ratio :8
Total Flow :17.4 mL/min
Ready Check[COL(Oven)] :ON
Ready Check[INJ] :ON
Ready Check[DET(Interface)] :ON
Ready Check[AUX1] :OFF
Ready Check[AUX2] :OFF
Ready Check[AUX3] :OFF
Ready Check[AUX4] :OFF
Ready Check[AUX5] :OFF
Ready Check[Carrier Gas Flow(SPL)] :ON
Ready Check[Wait] :OFF
Equilibrium Time :1.00 min
Oven Temp. Program :
Rate Temperature(°C) Keep Time(min)
- 50.0 2.00
4.0 300.0 6.00
Pressure Program :
Rate Pressure(kPa) Keep Time(min)
- 150.0 0.00
AUX1 Program :
Rate Temperature(°C) Keep Time(min)
- 0.0 0.00

[GC Program]
[GCMS-QP5050]
Acquisition Mode :Scan
Interface Temp. :300.00 °C
Solvent Cut Time :2.00 min
Detector Gain Mode :Relative
Detector Gain :0.00 kV
Threshold :1000
Sampling Rate :0.50 sec

[Scan Group]
No. Start Time(min) End Time(min) Start m/z End m/z Scan Speed
1 5.00 70.00 30.00 600.00 2000

Sample Inlet Unit :GC

[MS Program]
Use MS Program :OFF

```

## 2) Gas chromatogram from the GC/MS analysis of the bark EOs

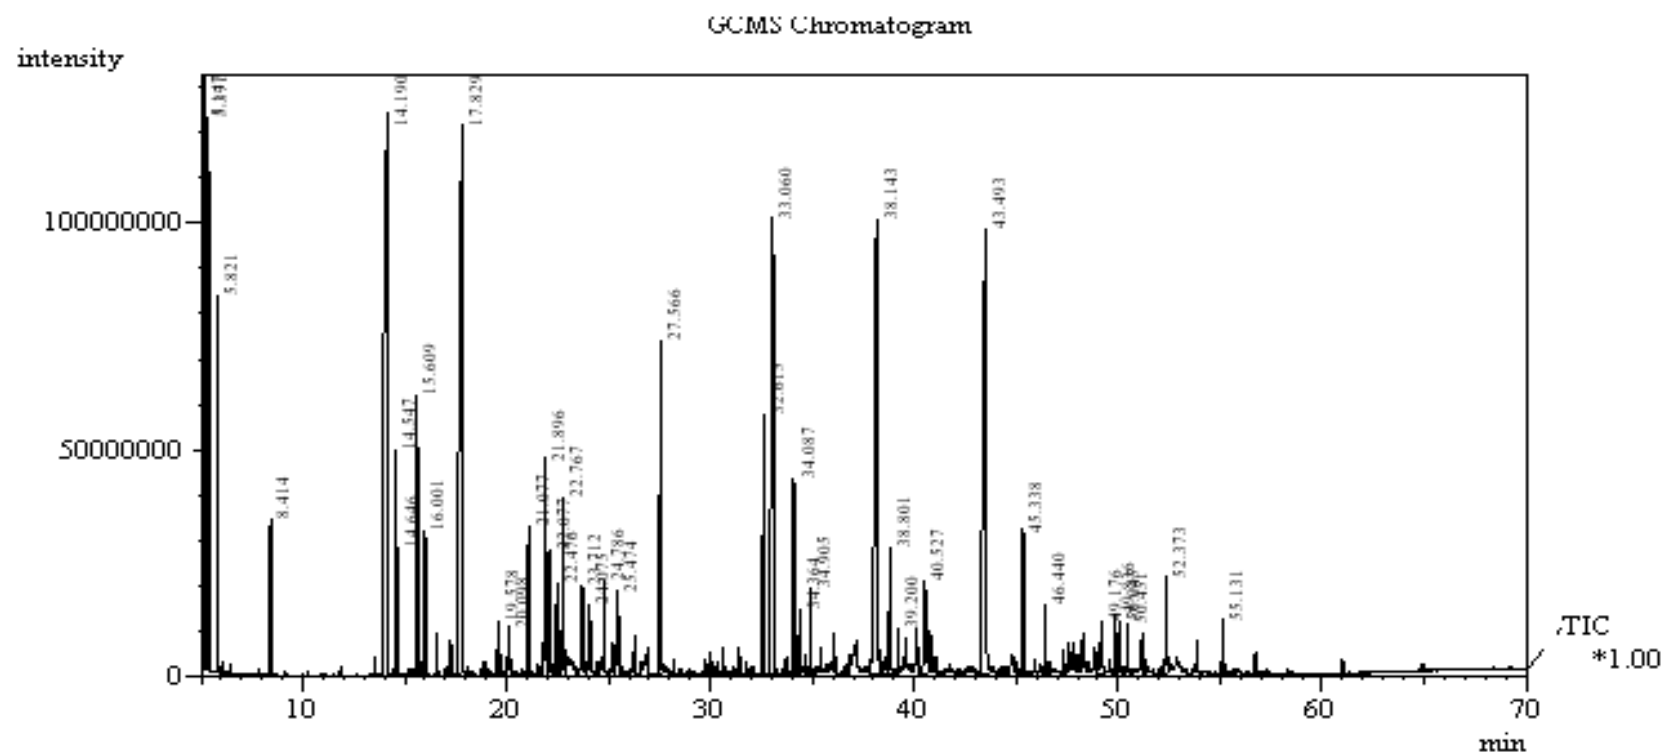

## 2-1) Condition and method

GC/MS Method

[Comment]

[GC-17A Ver.3]  
 Inj. Initial Temp. :270.00 °C  
 Interface Temp. :300.00 °C  
 Control Mode :Split  
 Column Inlet Pressure :150.0 kPa  
 Column Flow :1.3 mL/min  
 Linear Velocity :29.6 cm/sec  
 Split Ratio :8  
 Total Flow :17.4 mL/min  
 Ready Check[COL(Oven)] :ON  
 Ready Check[INJ] :ON  
 Ready Check[DET(Interface)] :ON  
 Ready Check[AUX1] :OFF  
 Ready Check[AUX2] :OFF  
 Ready Check[AUX3] :OFF  
 Ready Check[AUX4] :OFF  
 Ready Check[AUX5] :OFF  
 Ready Check[Carrier Gas Flow(SPL)] :ON  
 Ready Check[Wait] :OFF  
 Equilibrium Time :1.00 min  
 Oven Temp. Program :  
 Rate : Temperature(°C) Keep Time(min)  
 - : 50.0 2.00  
 4.0 : 300.0 6.00

Pressure Program :  
 Rate : Pressure(kPa) Keep Time(min)  
 - : 150.0 0.00

AUX1 Program :  
 Rate : Temperature(°C) Keep Time(min)  
 - : 0.0 0.00

[GC Program]

[GCMS-QP5050]  
 Acquisition Mode :Scan  
 Interface Temp. :300.00 °C  
 Solvent Cut Time :2.00 min  
 Detector Gain Mode :Relative  
 Detector Gain :0.00 kV  
 Threshold :1000  
 Sampling Rate :0.50 sec

[Scan Group]

| No. | Start Time(min) | End Time(min) | Start m/z | End m/z | Scan Speed |
|-----|-----------------|---------------|-----------|---------|------------|
| 1   | 5.00            | 70.00         | 30.00     | 600.00  | 2000       |

Sample Inlet Unit :GC

[MS Program]  
 Use MS Program :OFF

### 3) Gas chromatogram from the GC/MS analysis of the needle EOs

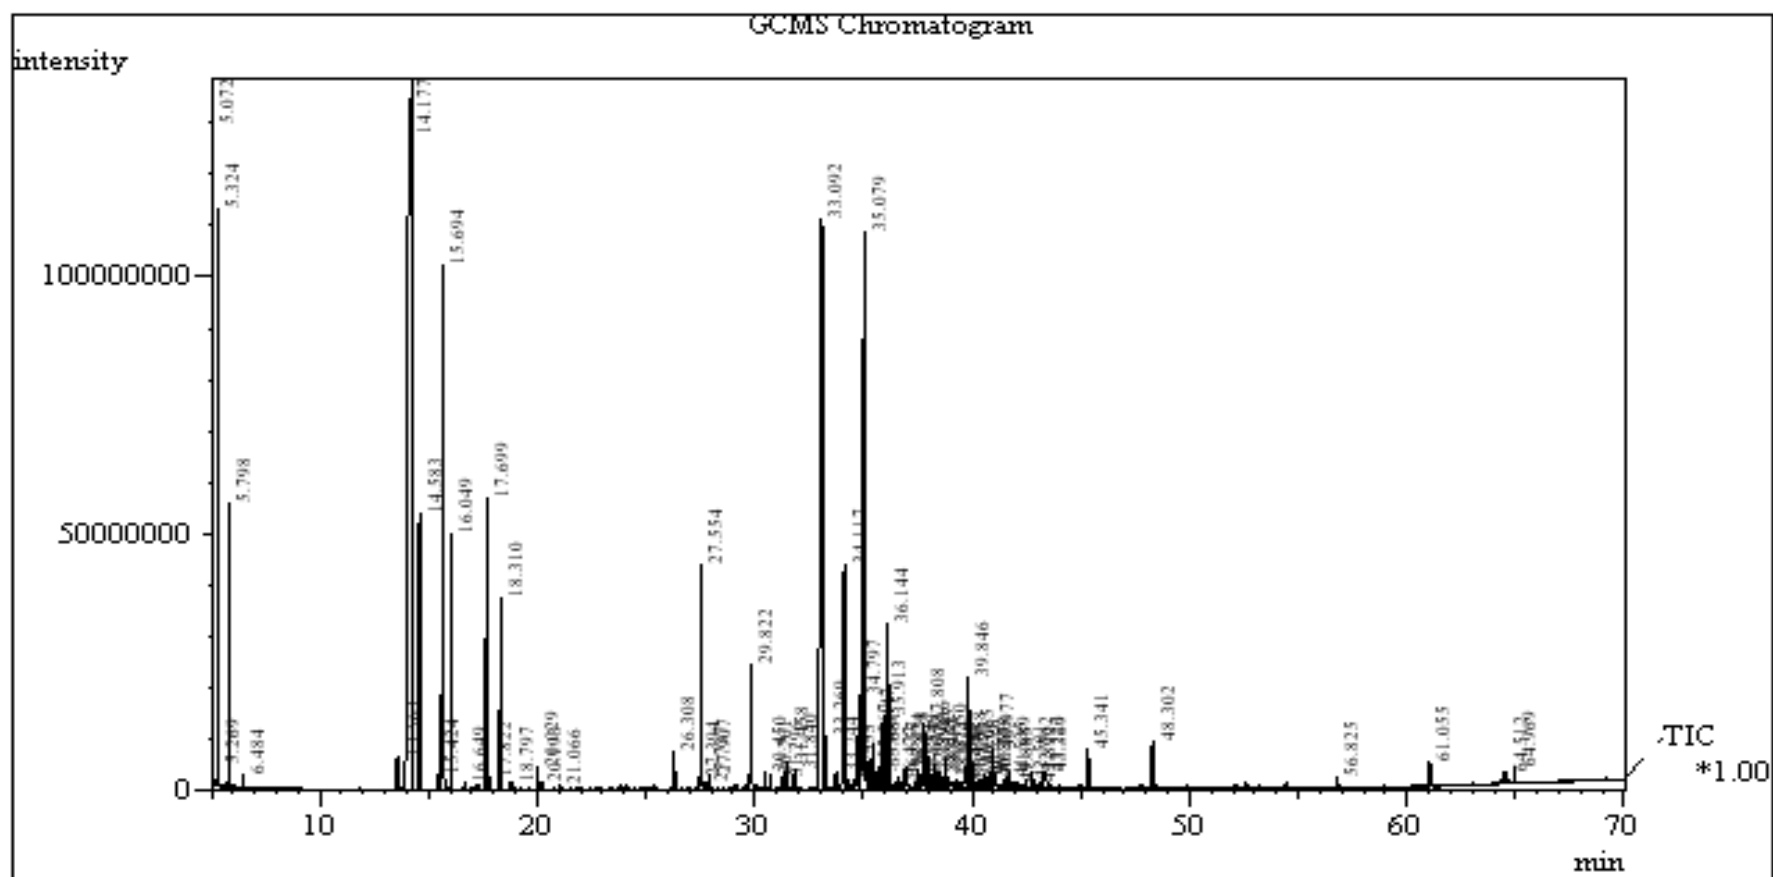

### 3-1) Condition and method

#### GCMS Method

[Comment]

```

[GC-17A Ver.3]
Inj. Initial Temp.      :270.00 °C
Interface Temp.        :300.00 °C
Control Mode           :Split
Column Inlet Pressure  :150.0 kPa
Column Flow            :1.3 mL/min
Linear Velocity        :29.6 cm/sec
Split Ratio            :8
Total Flow             :17.4 mL/min
Ready Check[COL(Oven)] :ON
Ready Check[INJ]      :ON
Ready Check[DET(Interface)] :ON
Ready Check[AUX1]     :OFF
Ready Check[AUX2]     :OFF
Ready Check[AUX3]     :OFF
Ready Check[AUX4]     :OFF
Ready Check[AUX5]     :OFF
Ready Check[Carrier Gas Flow(SPL)] :ON
Ready Check[Wait]     :OFF
Equilibrium Time      :1.00 min
Oven Temp. Program    :
Rate                  :Temperature(°C)   Keep Time(min)
-                    :30.0              2.00
4.0                  :300.0             6.00

Pressure Program     :
Rate                 :Pressure(kPa)     Keep Time(min)
-                    :150.0              0.00

AUX1 Program         :
Rate                 :Temperature(°C)   Keep Time(min)
-                    :0.0                0.00
  
```

[GC Program]

```

[GCMS-QP5050]
Acquisition Mode     :Scan
Interface Temp.      :300.00 °C
Solvent Cut Time     :2.00 min
Detector Gain Mode   :Relative
Detector Gain        :0.00 kV
Threshold            :1000
Sampling Rate        :0.50 sec
  
```

[Scan Group]

| No. | Start Time(min) | End Time(min) | Start m/z | End m/z | Scan Speed |
|-----|-----------------|---------------|-----------|---------|------------|
| 1   | 5.00            | 70.00         | 30.00     | 600.00  | 2000       |

Sample Inlet Unit :GC

[MS Program]

Use MS Program :OFF
